# Supplementary material
Source: HighWire-hosted journal article supplement (https://drc.bmj.com/content/12/5/e004382)
Supplement: inline-supplementary-material-1 [file inline-supplementary-material-1.pdf]

**Title:** Long-Term Health and Economic Impact of a Low-Intensity Lifestyle Program to Prevent Type 2 Diabetes Mellitus in Germany: A Simulation Study.

**Authors:** Katherine Ogurtsova, Michael Laxy, Karl MF Emmert-Fees, Charalabos-Markos Dintsios, Ping Zhang, Andrea Icks

### Supplementary Materials

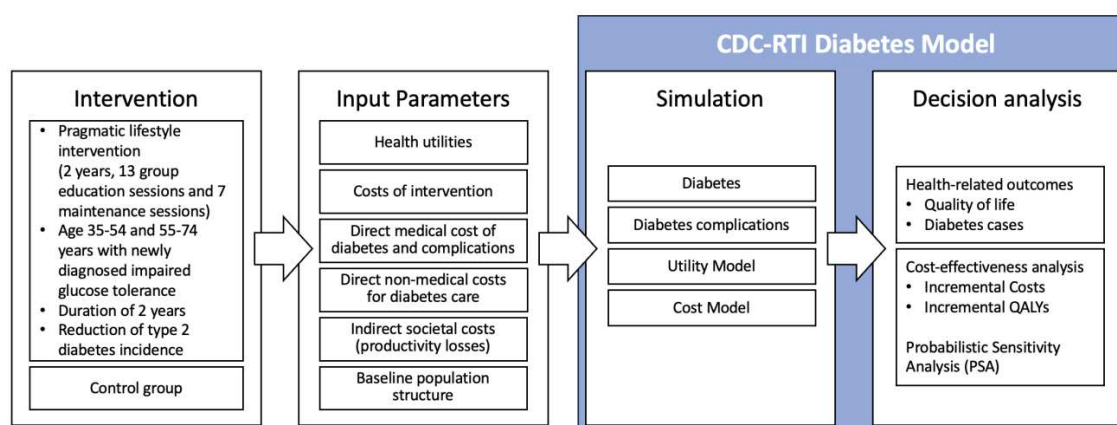

Supplementary Figure 1 The workflow of the analysis.

Supplementary Table 1 Key model parameter values used for simulating the long-term health and economic impacts of a lifestyle intervention for preventing type 2 diabetes in Germany

| Description                                                                                                 | Value                                                            | Source | Comments                                                                                                                                                                                                                                                                    |
|-------------------------------------------------------------------------------------------------------------|------------------------------------------------------------------|--------|-----------------------------------------------------------------------------------------------------------------------------------------------------------------------------------------------------------------------------------------------------------------------------|
| Age- and sex-adjusted cost ratio of "intermediate hyperglycaemia" vs "no diabetes" in Germany               | 1.09                                                             | (1)    |                                                                                                                                                                                                                                                                             |
| Annual cost of health care for a person without type 2 diabetes, in € (2015)                                | 2196.00<br>[Gamma distribution,<br>SE: 555.93]                   | (2)    | Costs of health care for a person with HbA1c are calculated with the use of the cost ratio.                                                                                                                                                                                 |
| Annual cost of health care for a person with HbA1c in the at-risk range with no treatment, in € (2015)      | 2393.64<br>[Gamma distribution,<br>SE: 597.05]                   |        |                                                                                                                                                                                                                                                                             |
| Annual cost of health care for a person with type 2 diabetes, in € (2015)                                   | 4727.00<br>[Gamma distribution,<br>SE: 547.75]                   |        |                                                                                                                                                                                                                                                                             |
| Annual patient time costs for a person with type 2 diabetes attributable to self-management, in € (2014)    | 2122.00                                                          | (3)    |                                                                                                                                                                                                                                                                             |
| Annual indirect societal costs caused by productivity losses per a person with type 2 diabetes, in € (2011) | 4103.00                                                          | (4)    | The costs were assigned to all individuals younger than 65 years old, the mean age of retirement in Germany in 2020 (5)                                                                                                                                                     |
| Cost of pragmatic lifestyle intervention Year 1, in €                                                       | 228.39<br>[Uniform distribution,<br>min: 114.20, max:<br>342.59] | (6)    | The Personal Social Services Research Unit costs applied to activities outlined as part of a recommended lifestyle program in NICE guidance. The costs in Pound Sterling were converted to € by applying purchasing power parities conversion in 2015. Reference year: 2015 |
| Cost of pragmatic lifestyle interventions Year 2, in €                                                      | 89.83<br>[Uniform distribution,<br>min: 44.92, max:<br>134.75]   |        |                                                                                                                                                                                                                                                                             |
| Utility decrement for onset of type 2 diabetes                                                              | -0.035                                                           | (7)    | The health-related quality of life was assessed by using the EuroQol five-dimensional five-level questionnaire (EQ-5D-5L).                                                                                                                                                  |
| Utility decrements for complications: Chronic heart failure                                                 | -0.080                                                           |        |                                                                                                                                                                                                                                                                             |
| Utility decrements for complications: Stroke                                                                | -0.069                                                           |        |                                                                                                                                                                                                                                                                             |
| Utility decrements for complications: Myocardial Infarction                                                 | -0.014                                                           |        |                                                                                                                                                                                                                                                                             |
| Utility decrements for complications: Neuropathy                                                            | -0.093                                                           |        |                                                                                                                                                                                                                                                                             |
| Utility decrements for complications: Blindness                                                             | -0.101                                                           |        |                                                                                                                                                                                                                                                                             |

|                                                                                                              |                                                  |       |                                                                                                                                                                                                    |
|--------------------------------------------------------------------------------------------------------------|--------------------------------------------------|-------|----------------------------------------------------------------------------------------------------------------------------------------------------------------------------------------------------|
| Utility decrements for complications: Nephropathy                                                            | -0.062                                           |       |                                                                                                                                                                                                    |
| Utility decrements for complications: Diabetic foot                                                          | -0.037                                           |       |                                                                                                                                                                                                    |
| Annual discount rate for costs                                                                               | 0.035                                            | (8,9) |                                                                                                                                                                                                    |
| Discount rate for effectiveness                                                                              | 0.035                                            |       |                                                                                                                                                                                                    |
| The relative risk of death with type 2 diabetes, male                                                        | 2.3                                              | (10)  | The age- and sex-specific relative risks are representative of the general population age 65-90 years in Germany. We assume that the same relative risks are valid in age groups 35-54 and 55-74.  |
| The relative risk of death with type 2 diabetes, female                                                      | 3                                                |       |                                                                                                                                                                                                    |
| Incidence rate of type 2 diabetes among 35-54 years old with HbA1c in at-risk range, per 1000 person-year    | 7.05                                             |       | The risk was obtained using the incidence rate ratio of diabetes in different age groups (11) and the estimated probability of type 2 diabetes in 55-74 age group from KORA S4-F4 follow-ups (12)  |
| Incidence rate of type 2 diabetes among 55-74 years old with HbA1c in at-risk range, per 1000 person-year    | 10.5                                             |       | Estimated from KORA S4-F4 follow-ups (12) by assessing the new cases of type 2 diabetes and life years under the risk in the follow-up waves S4 and F4 for persons 55-74 years old at the baseline |
| The relative risk of type 2 diabetes in participant undertaking pragmatic lifestyle program in years 1 and 2 | 0.74<br>[Log-normal distribution, median: 0.735] | (13)  | The value was taken from the meta-analysis of randomized clinical trials. We assumed relative risk reduction equal for IFG, IGT and HbA1c as insufficient primary studies to analyze differences.  |
| Total number of individuals in the age group 35-54 in Germany                                                | 22,181,829                                       | (14)  | The general population in the reference year 2020                                                                                                                                                  |
| Total number of individuals in the age group 55-74 in Germany                                                | 20,918,203                                       |       |                                                                                                                                                                                                    |
| Prevalence of high-risk individuals defined by HbA1c at range 6.0-6.4 %, 35-54 years old, Germany            | 10.4%                                            | (15)  |                                                                                                                                                                                                    |
| Prevalence of high-risk individuals defined by HbA1c at range 6.0-6.4 %, 55-74 years old, Germany            | 29.5%                                            |       | Estimated from KORA S4 follow-up (12)                                                                                                                                                              |
| Yearly expenditure on diabetes in Germany, in 2021, €                                                        | 4,6251.3 Million                                 | (16)  | The total diabetes-related expenditures in 2021                                                                                                                                                    |

Notes: IFG - impaired fasting glycaemia; IGT - impaired glucose tolerance; KORA - Cooperative Research in the Region of Augsburg; SE – standard deviation.

*Supplementary Table 2: Health utility decrement associated with diabetes and diabetes complications*

| <b>Factors</b>                                            | <b>Coefficients</b> |
|-----------------------------------------------------------|---------------------|
| Diabetes Intercept: onset to diagnosis                    | 0.700               |
| Diabetes Intercept: early diagnosis to clinical diagnosis | 0.700               |
| Diabetes Intercept: after clinical diagnosis              | 0.700               |
| Intermediate hyperglycaemia Intercept                     | 0.717               |
| No diabetes Intercept                                     | 0.722               |
| Female                                                    | -0.027              |
| Hypertension                                              | -0.001              |
| Blind                                                     | -0.100              |
| Nephropathy                                               | -0.064              |
| End Stage Renal Disease (ESRD)                            | -0.064*             |
| Peripheral Neuropathy                                     | -0.092              |
| Foot Ulcer                                                | -0.037              |
| Lower Extremity Amputation                                | -0.037              |
| History of CA/MI                                          | -0.014              |
| Congestive heart failure                                  | -0.080              |
| Stroke                                                    | -0.069              |
| BMI $\geq$ 30.0                                           | -0.040              |

\* - assumed equal to nephropathy; no data in the original study

*Supplementary Table 3: Cumulative type 2 diabetes incidence and diabetes risk reduction for individual participation in 10 years and at the end of the simulation*

|                        | No intervention                         |                              | Pragmatic lifestyle intervention        |                              |                            |                              |
|------------------------|-----------------------------------------|------------------------------|-----------------------------------------|------------------------------|----------------------------|------------------------------|
|                        | Cumulative incidence type 2 diabetes, % |                              | Cumulative incidence type 2 diabetes, % |                              | Relative risk reduction, % |                              |
|                        | After 10 years                          | At the end of the simulation | After 10 years                          | At the end of the simulation | After 10 years             | At the end of the simulation |
| Cohort 35-54 years old | 6.68                                    | 21.05                        | 6.16                                    | 20.61                        | 7.78                       | 2.09                         |
| Cohort 55-74 years old | 9.00                                    | 16.77                        | 8.27                                    | 16.10                        | 8.11                       | 4.00                         |

*Supplementary Table 4 The distribution parameters of incremental cost, effects and cost-effectiveness ratios relative to no intervention for individual participants in a prevention program over a lifetime perspective from probabilistic sensitivity analysis (health care system perspective)*

|                                                 | <b>Mean</b> | <b>Median</b> | <b>Standard deviation</b> | <b>2.5% quantile</b> | <b>97.5% quantile</b> |
|-------------------------------------------------|-------------|---------------|---------------------------|----------------------|-----------------------|
| <b>Cohort 35-54 years old</b>                   |             |               |                           |                      |                       |
| Effect vs no intervention (QALYs), incremental  | 0.01        | 0.01          | 0.003                     | 0.01                 | 0.02                  |
| Costs vs no intervention (€, 2020), incremental | 165.39      | 172.02        | 98.83                     | -42.27               | 349.72                |
| ICER (€/QALY)                                   | 18,071.33   | 15,602.56     | 27,896.28                 | -2,904.53            | 46,668.14             |
| <b>Cohort 55-74 years old</b>                   |             |               |                           |                      |                       |
| Effect vs no intervention (QALYs), incremental  | 0.02        | 0.02          | 0.004                     | 0.01                 | 0.02                  |
| Costs vs no intervention (€, 2020), incremental | 223.17      | 224.72        | 90.05                     | 44.59                | 402.92                |
| ICER (€/QALY)                                   | 15,999.64   | 14,729.45     | 9,963.87                  | 2,543.01             | 36,954.60             |

Supplementary Table 5: Incremental cost-effectiveness ratios and cost-effectiveness relative to no intervention for individual participants in a prevention program over a lifetime perspective (health care system perspective)

| Length of intervention         | Costs vs no intervention (€, 2020), incremental | Effect vs no intervention (QALYs), incremental | Incremental cost-effectiveness ratios (ICER) (relative to no intervention) |                                     |                                     |                                      | WPT needed to achieve a probability of cost-effectiveness |          |          |          |
|--------------------------------|-------------------------------------------------|------------------------------------------------|----------------------------------------------------------------------------|-------------------------------------|-------------------------------------|--------------------------------------|-----------------------------------------------------------|----------|----------|----------|
|                                |                                                 |                                                | ICER (€/QALY)                                                              | Probability ICER < 20,000 €/QALY, % | Probability ICER < 50,000 €/QALY, % | Probability ICER < 100,000 €/QALY, % | Probability ICER < 0 €/QALY, %                            | >= 50%   | >= 75%   | >= 95%   |
| <b>Cohort 35-54 years old</b>  |                                                 |                                                |                                                                            |                                     |                                     |                                      |                                                           |          |          |          |
| Health care system perspective | 165.24                                          | 0.011                                          | 14,689.76                                                                  | 65.4                                | 98.0                                | 99.8                                 | 5.1                                                       | 15,602.5 | 23,849.7 | 40,390.2 |
| Societal perspective           | -42.80                                          | 0.011                                          | -3,804.53                                                                  |                                     |                                     |                                      |                                                           |          |          |          |
| <b>Cohort 55-74 years old</b>  |                                                 |                                                |                                                                            |                                     |                                     |                                      |                                                           |          |          |          |
| Health care system perspective | 220.88                                          | 0.015                                          | 14,372.40                                                                  | 74.0                                | 99.2                                | 99.9                                 | 0.4                                                       | 14,729.5 | 20,235.4 | 31,745.4 |
| Societal perspective           | 70.36                                           | 0.015                                          | 4,578.17                                                                   |                                     |                                     |                                      |                                                           |          |          |          |

*Supplementary Table 6: Incremental cost-effectiveness ratios and cost-effectiveness relative to no intervention for individual participants in a prevention program over a lifetime perspective with alternative assumptions on epidemiological and economic parameters (health care system perspective)*

| Scenario                                           | Cohort 35-54 years old                                                      |                            |                                                     | Cohort 55-74 years old                          |                            |                                                     |
|----------------------------------------------------|-----------------------------------------------------------------------------|----------------------------|-----------------------------------------------------|-------------------------------------------------|----------------------------|-----------------------------------------------------|
|                                                    | Life-time incremental costs from a health care system perspective (€, 2020) | Lifetime incremental QALYs | ICER (€/QALY) from a health care system perspective | Costs vs no intervention (€, 2020), incremental | Lifetime incremental QALYs | ICER (€/QALY) from a health care system perspective |
| Base case                                          | 96.08                                                                       | 0.02                       | 14,689.76                                           | 220.88                                          | 0.02                       | 14,372.40                                           |
| Low Prevention program Costs Parameters            | 3.76                                                                        | 0.01                       | 333.99                                              | 61.45                                           | 0.02                       | 3,998.28                                            |
| High Baseline Medical Costs Parameters             | 36.56                                                                       | 0.01                       | 3,250.32                                            | 106.00                                          | 0.02                       | 6,897.27                                            |
| High Prevention program Risks Parameters           | 86.42                                                                       | 0.02                       | 5,117.34                                            | 172.06                                          | 0.02                       | 7,454.20                                            |
| After intervention 2 years with 50% effect         | 121.57                                                                      | 0.01                       | 8,302.85                                            | 197.62                                          | 0.02                       | 10,011.61                                           |
| After intervention 2 years with 50% and 25% effect | 132.06                                                                      | 0.01                       | 9,562.64                                            | 202.99                                          | 0.02                       | 10,866.54                                           |
| After intervention 1 year with 50% effect          | 142.56                                                                      | 0.01                       | 10,983.86                                           | 208.35                                          | 0.02                       | 11,824.25                                           |
| After intervention 2 years with 25% effect         | 143.41                                                                      | 0.01                       | 11,078.48                                           | 209.25                                          | 0.02                       | 11,921.24                                           |
| After intervention 1 year with 25% effect          | 153.90                                                                      | 0.01                       | 12,704.49                                           | 214.62                                          | 0.02                       | 13,011.33                                           |
| Low Baseline Medical Costs Parameters              | 293.92                                                                      | 0.01                       | <b>26,129.20</b>                                    | 335.76                                          | 0.02                       | <b>21,847.50</b>                                    |
| High Prevention program Costs Parameters           | 326.72                                                                      | 0.01                       | <b>29,045.50</b>                                    | 380.31                                          | 0.02                       | <b>24,746.50</b>                                    |
| Low Prevention program Risks Parameters            | 243.92                                                                      | 0.01                       | <b>43,407.50</b>                                    | 269.57                                          | 0.01                       | <b>35,127.70</b>                                    |



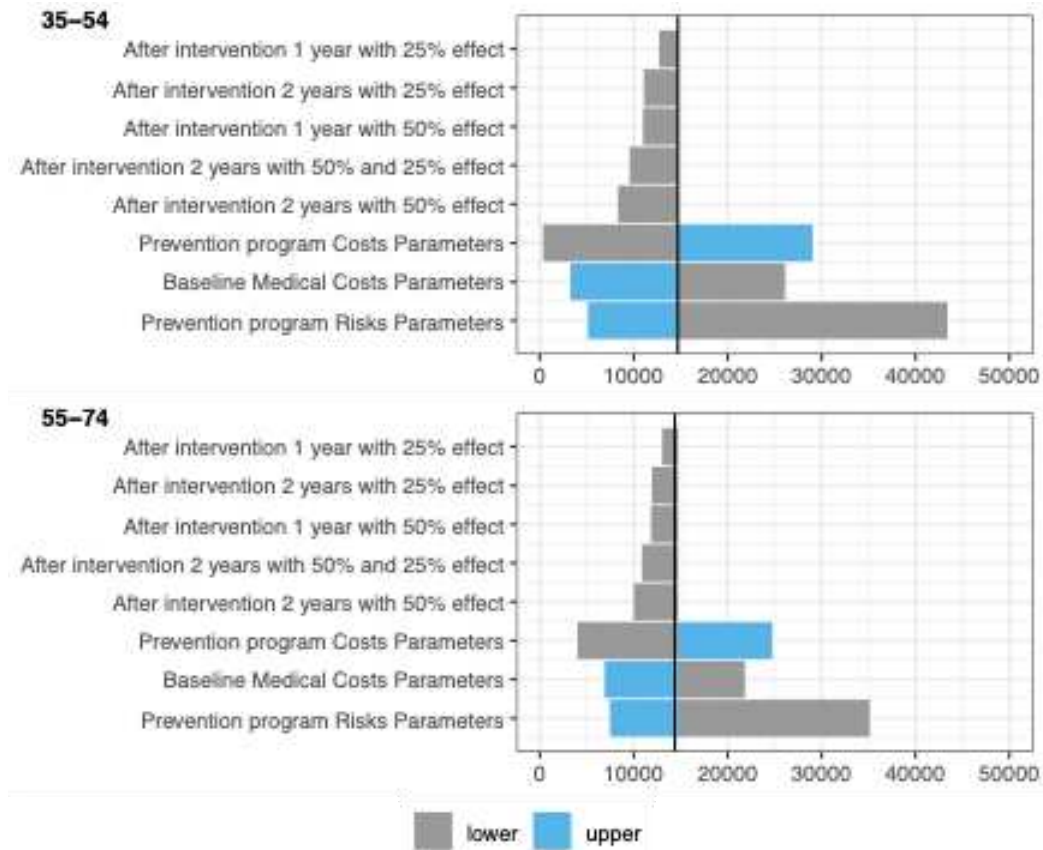

Supplementary Figure 2 Tornado diagram of Incremental cost-effectiveness ratios relative to no intervention for individual participants in a prevention program over a lifetime perspective with alternative assumptions on epidemiological and economic parameters (health care system perspective).

*Supplementary Table 7: Incremental cost-effectiveness ratios relative to no intervention with different cost structures at the end of the simulation (lifetime perspective)*

| <b>Cost perspective</b>                                                         | <b>35-54 years</b> | <b>55-74 years</b> |
|---------------------------------------------------------------------------------|--------------------|--------------------|
| Only direct medical costs (€, 2020)                                             | 14,689.76          | 14,372.40          |
| Direct medical + Indirect societal costs (€, 2020)                              | 11,128.60          | 23,105.36          |
| Direct medical + Non-medical (patient time) costs (€, 2020)                     | -243.36            | 14,368.62          |
| Direct medical + Non-medical (patient time) + Indirect societal costs (€, 2020) | -3,804.53          | 4,578.71           |

*Supplementary Table 8 Estimated cumulative incidence of type 2 diabetes for control and intervention groups by implementing a nation-wide diabetes prevention program In Germany*

| Population at high risk of developing type 2 diabetes |                         | Cumulative incidence of type 2 diabetes in control group, lifetime | Cumulative incidence of type 2 diabetes in intervention group, lifetime | Lifetime reduction in incident cases of type 2 diabetes, cases |
|-------------------------------------------------------|-------------------------|--------------------------------------------------------------------|-------------------------------------------------------------------------|----------------------------------------------------------------|
| Total N                                               | Mean % of participating |                                                                    |                                                                         |                                                                |
| <b>Cohort 35-54 years</b>                             |                         |                                                                    |                                                                         |                                                                |
| 2,308,625                                             | 100%                    | 1,298,752                                                          | 1,271,964                                                               | 26,788                                                         |
| 1,154,312                                             | 50%                     | 649,376                                                            | 635,982                                                                 | 13,394                                                         |
| 577,156                                               | 25%                     | 324,688                                                            | 317,991                                                                 | 6,697                                                          |
| 230,862                                               | 10%                     | 129,875                                                            | 127,196                                                                 | 2,679                                                          |
| 115,431                                               | 5%                      | 64,937                                                             | 63,598                                                                  | 1,339                                                          |
| <b>Cohort 55-74 years</b>                             |                         |                                                                    |                                                                         |                                                                |
| 6,170,870                                             | 100%                    | 387,101                                                            | 371,781                                                                 | 15,319                                                         |
| 3,085,435                                             | 50%                     | 193,550                                                            | 185,891                                                                 | 7,660                                                          |
| 1,542,718                                             | 25%                     | 96,775                                                             | 92,945                                                                  | 3,830                                                          |
| 617,087                                               | 10%                     | 38,710                                                             | 37,178                                                                  | 1,532                                                          |
| 30,854                                                | 5%                      | 19,355                                                             | 18,589                                                                  | 766                                                            |

### Assumptions

Conducting this study, we made some important assumptions, which were mostly conservative. First, we assumed that the effect of the lifestyle intervention taken from a systematic review (13) was similar in all subgroups. In the original review, progression to type 2 diabetes appeared to be independent of age and ethnicity but increased with a higher percentage of male participants. At the same time, participants with overweight saw bigger gains in terms of the reduction of type 2 diabetes. In our analysis, all participants were assumed to be “White” and not obese (BMI < 30 kg/m<sup>2</sup>) which reflects the German population, according to population-based studies (12). The percentage of males reflected the German population as well. We did not expect significant variations of the intervention effect in such a relatively homogeneous population. However, further research of how the intervention outcomes is modified depending on participant characteristics may increase the efficacy of tailored advice, for example by focusing on specific sub-groups with a higher risk of a particular complications, thereby improving cost-effectiveness (17,18).

There is a lack of evidence on the incidence of type 2 diabetes in the population aged 35-54 with intermediate hyperglycaemia in Germany. To derive the incidence of diabetes in this cohort, we used incidence rate ratios from a study of the rate of progression to diabetes (11). We must be aware that this combined estimate might not accurately reflect reality. Further research on diabetes incidence in Germany is needed with the focus on younger cohorts of people with intermediate hyperglycaemia.

We also assumed equal risks of diabetes-related death in all subgroups. While there is no difference in diabetes-related mortality rate ratios between men and women in Germany (19), the age-specific mortality rate ratios are reported higher for younger

participants in German studies (20,21), which may lead to lower ICER in the economic evaluation and result in higher probability of cost-effectiveness.

We did not implement in the model direct effects of the intervention on mortality or incidence of diabetes complications, either, because we are not aware of any evidence that the pragmatic lifestyle intervention directly affects all-cause mortality or incidence of late state complications.

Regarding the equal mortality risks in persons with normoglycemia and with intermediate hyperglycaemia supposed in our simulation, there is some contradictory evidence. People with intermediate hyperglycaemia have an elevated risk of sudden cardiac death (22). A higher risk of all-cause mortality was detected in both the IFG and IGT based intermediate hyperglycaemia groups but not when intermediate hyperglycaemia was defined with the HbA1c diagnostic criterium (23). In our analysis, the intermediate hyperglycaemia definition was based on HbA1c. Moreover, in the CDC-RTI DM, no diabetes-related complications are assumed for the intermediate hyperglycaemia group and no death from a specific cause, such as a cardiac arrest, is possible.

We did not assume any special screening for intermediate hyperglycaemia but occasional diagnosis under the standard medical care. By varying the participation rate in the public health analysis, that might potentially include the participation in any screening as well, we showed rough scale of expenses and gains.

Adherence of participants to the prevention program was assumed being equivalent to those in real-world setting studies. We may suppose that it might be even lower if implemented in a routine outpatient practice. However, we expect that lower adherence

may result in a lower effect of the program; correspondingly, we have shown the consequences of reduced effect in the sensitivity analysis.

Conservatively, we assumed that the effects of the intervention persist only for the intervention period. In general, the assumptions about the effect lasting in modelling studies varied (24), and it was shown that for some interventions, the cost-effectiveness would be 10 times higher (25) if the effectiveness was assumed to be lifelong instead of persisting for one year. Such long-term effects have been demonstrated in the clinical trials (26,27), thus these results are the most conservative.

There is no reversion from intermediate hyperglycaemia to normoglycemia possible in our model due to no solid evidence supporting in pragmatic interventions (28).

Studies have shown that lifestyle intervention participants have higher health utilities than those who do not participate (29). However, we assumed the same utilities in both intervention and routine care scenarios, which renders our estimates even more conservative.

*Reference List:*

1. Bächle C, Claessen H, Andrich S, Brüne M, Dintsios CM, Slomiany U, et al. Direct costs in impaired glucose regulation: Results from the populationbased heinz nixdorf recall study. *BMJ Open Diabetes Res Care*. 2016;4(1).
2. Kähm K, Stark R, Laxy M, Schneider U, Leidl R. Assessment of excess medical costs for persons with type 2 diabetes according to age groups: an analysis of German health insurance claims data. *Diabetic Medicine*. 2019 Dec 23;dme.14213.
3. Icks A, Haastert B, Arend W, Konein J, Thorand B, Holle R, et al. Patient time costs due to self-management in diabetes may be as high as direct medical costs: results from the population-based KORA survey FF4 in Germany. *Diabetic Medicine*. 2020;37(5):895–7.
4. Ulrich S, Holle R, Wacker M, Stark R, Icks A, Thorand B, et al. Cost burden of type 2 diabetes in Germany: results from the population-based KORA studies. *BMJ Open*. 2016 Nov 21;6(11):e012527.
5. Deutsche Rentenversicherung Bund. Statistik der Deutschen Rentenversicherung: Rente 2020. Berlin; 2021 Jun.
6. Roberts S, Craig D, Adler A, McPherson K, Greenhalgh T. Economic evaluation of type 2 diabetes prevention programmes: Markov model of low- and high-intensity lifestyle programmes and metformin in participants with different categories of intermediate hyperglycaemia. *BMC Med*. 2018;16(1):16.
7. Laxy M, Backer J, Kähm K, Holle R, Peters A, Thorand B, et al. Diabetes, related complications, and quality of life: A German reference value set based on a population-based survey. 2020.
8. The National Institute for Health and Care. Guide to the methods of technology appraisal. *Nice*. 2018;(April 2013):1–93.
9. HM Treasury. Central Government Guidance on Appraisal and Evaluation. *The Green Book*. 2018. 1–33 p.
10. Tönnies T, Hoyer A, Brinks R. Excess mortality for people diagnosed with type 2 diabetes in 2012 – Estimates based on claims data from 70 million Germans. *Nutrition, Metabolism and Cardiovascular Diseases*. 2018 Sep 1;28(9):887–91.
11. DeJesus RS, Breikopf CR, Rutten LJ, Jacobson DJ, Wilson PM, Sauver J St. Incidence Rate of Prediabetes Progression to Diabetes: Modeling an Optimum Target Group for Intervention. *Popul Health Manag*. 2017;20(3):216–23.
12. Holle R, Happich M, Löwel H, Wichmann H. KORA - A Research Platform for Population Based Health Research. *Das Gesundheitswesen*. 2005;67(S 01):19–25.
13. Ashra NB, Spong R, Carter P, Davies MJ, Dunkley A, Gillies C, et al. A systematic review and meta- analysis assessing the effectiveness of pragmatic lifestyle interventions for the prevention of type 2 diabetes mellitus in routine practice *About Public Health England*. England, Public Health [Internet]. 2015;1–172. Available from: [https://www.gov.uk/government/uploads/system/uploads/attachment\\_data/file/456147/PH\\_E\\_Evidence\\_Review\\_of\\_diabetes\\_prevention\\_programmes-\\_FINAL.pdf](https://www.gov.uk/government/uploads/system/uploads/attachment_data/file/456147/PH_E_Evidence_Review_of_diabetes_prevention_programmes-_FINAL.pdf)
14. Homepage - Statistisches Bundesamt [Internet]. [cited 2020 Oct 26]. Available from: [https://www.destatis.de/EN/Home/\\_node.html](https://www.destatis.de/EN/Home/_node.html)
15. Greiner GG, Emmert-Fees KMF, Becker J, Rathmann W, Thorand B, Peters A, et al. Toward targeted prevention: risk factors for prediabetes defined by impaired fasting glucose, impaired glucose tolerance and increased HbA1c in the population-based KORA study from Germany. *Acta Diabetol*. 2020;57(12):1481–91.

16. International Diabetes Federation. IDF Diabetes Atlas, the Tenth Edition. 10th ed. Brussels, Belgium; 2021.
17. Chung WK, Erion K, Florez JC, Hattersley AT, Hivert MF, Lee CG, et al. Precision medicine in diabetes: a Consensus Report from the American Diabetes Association (ADA) and the European Association for the Study of Diabetes (EASD). *Diabetologia*. 2020 Jun 19;
18. Zaharia OP, Roden M. Diabetes clusters: Diabetes subgroups and complications. *Diabetologie*. 2020;
19. Schmidt C, Reitzle L, Heidemann C, Paprott R, Ziese T, Scheidt-Nave C, et al. Excess mortality in adults with documented diabetes in Germany: routine data analysis of all insurance claims in Germany 2013–2014. *BMJ Open*. 2021 Jan 6;11(1):e041508.
20. Röckl S, Brinks R, Baumert J, Paprott R, Du Y, Heidemann C, et al. All-cause mortality in adults with and without type 2 diabetes: findings from the national health monitoring in Germany. *BMJ Open Diab Res Care*. 2017 Dec 16;5(1):e000451.
21. Linkeviciute-Ulinskiene D, Kaceniene A, Dulskas A, Patasius A, Zabuliene L, Smailyte G. Increased Mortality Risk in People with Type 2 Diabetes Mellitus in Lithuania. *Int J Environ Res Public Health*. 2020 Sep 20;17(18):6870.
22. Aune D, Schlesinger S, Norat T, Riboli E. Diabetes mellitus and the risk of sudden cardiac death: A systematic review and meta-analysis of prospective studies. *Nutrition, Metabolism and Cardiovascular Diseases*. 2018 Jun 1;28(6):543–56.
23. Huang Y, Cai X, Mai W, Li M, Hu Y. Association between prediabetes and risk of cardiovascular disease and all cause mortality: systematic review and meta-analysis. *BMJ*. 2016 Nov 23;355:i5953.
24. Saha S, Gerdtham UG, Johansson P. Economic evaluation of lifestyle interventions for preventing diabetes and cardiovascular diseases. *Int J Environ Res Public Health*. 2010 Aug;7(8):3150–95.
25. EA F, O K, JC W. Cost-effectiveness of WISEWOMAN, a program aimed at reducing heart disease risk among low-income women. *J Womens Health (Larchmt)*. 2006 May;15(4):379–89.
26. Nathan DM, Barrett-Connor E, Crandall JP, Edelstein SL, Goldberg RB, Horton ES, et al. Long-term Effects of Lifestyle Intervention or Metformin on Diabetes Development and Microvascular Complications: the DPP Outcomes Study. *Lancet Diabetes Endocrinol* [Internet]. 2015 Nov 1 [cited 2024 Mar 15];3(11):866. Available from: /pmc/articles/PMC4623946/
27. Orchard TJ, Temprosa M, Barrett-Connor E, Fowler SE, Goldberg RB, Mather KJ, et al. Long-term effects of the Diabetes Prevention Program interventions on cardiovascular risk factors: a report from the DPP Outcomes Study. *Diabet Med* [Internet]. 2013 Jan [cited 2024 Mar 15];30(1):46–55. Available from: <https://pubmed.ncbi.nlm.nih.gov/22812594/>
28. Vistisen D, Kivimäki M, Perreault L, Hulman A, Witte DR, Brunner EJ, et al. Reversion from prediabetes to normoglycaemia and risk of cardiovascular disease and mortality: the Whitehall II cohort study. *Diabetologia*. 2019 Aug 23;62(8):1385–90.
29. Herman WH, Hoerger TJ, Brandle M, Hicks K, Sorensen S, Zhang P, et al. The cost-effectiveness of lifestyle modification or metformin in preventing type 2 diabetes in adults with impaired glucose tolerance. *Ann Intern Med*. 2005 Mar;142(5):323–32.
